# Supplementary material for: Chloroquine Overcomes Chemotherapy Resistance and Suppresses Cancer Metastasis by Eradicating Dormant Cancer Cells
Source: Research Square preprint supplement (doi:10.21203/rs.3.rs-6237822/v1), 2025-05-06
Supplement: Supplementary file 1 [file 852b600dc82a10485928194f.pdf]

# Supplementary material to m/s “Chloroquine Overcomes Chemotherapy Resistance and Suppresses Cancer Metastasis by Eradicating Dormant Cancer Cells” by Mikeladze et al

Figure S1

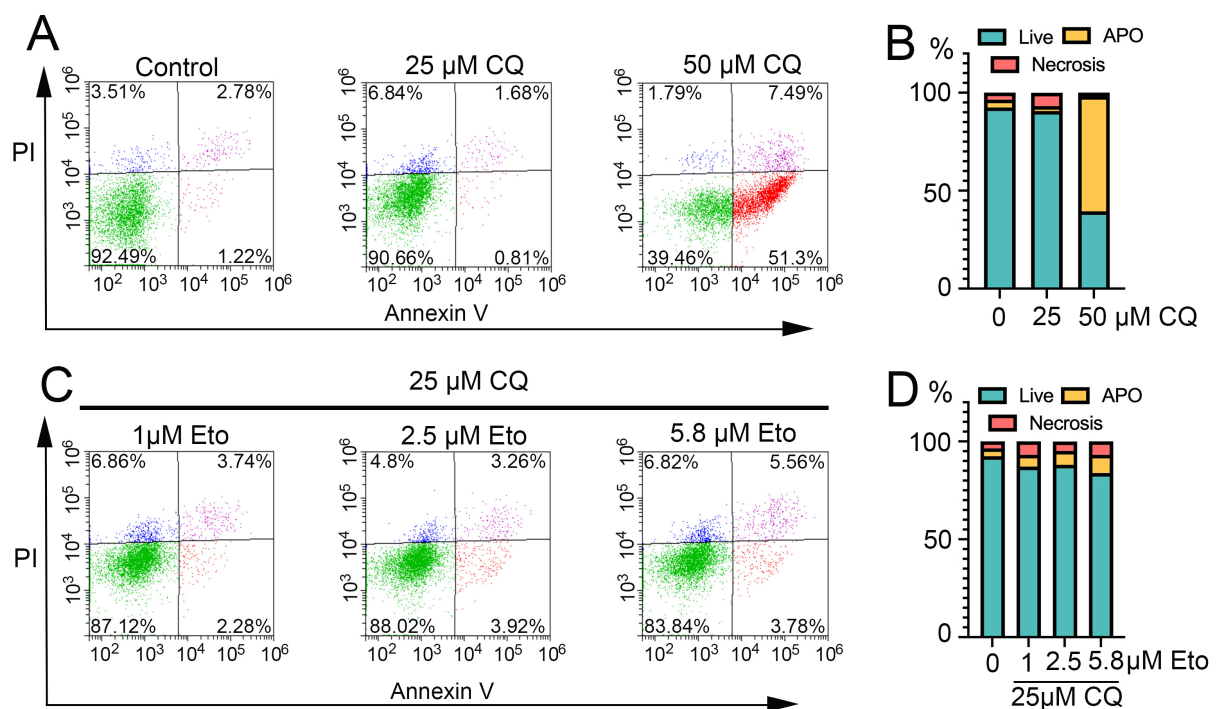

Figure S1. Chloroquine is well tolerated by normal fibroblasts (DF2) even when combined with etoposide

(A) Flow cytometry plots of A549 cells treated with 25  $\mu$ M or 50  $\mu$ M CQ. (B) Quantification of apoptotic cells from two independent experiments as in (A). (C) Flow cytometry plots of A549 cells treated with 25  $\mu$ M CQ in combination with etoposide at the indicated concentrations. (D) Quantification of apoptotic cells from two independent experiments as in (C).

Figure S2

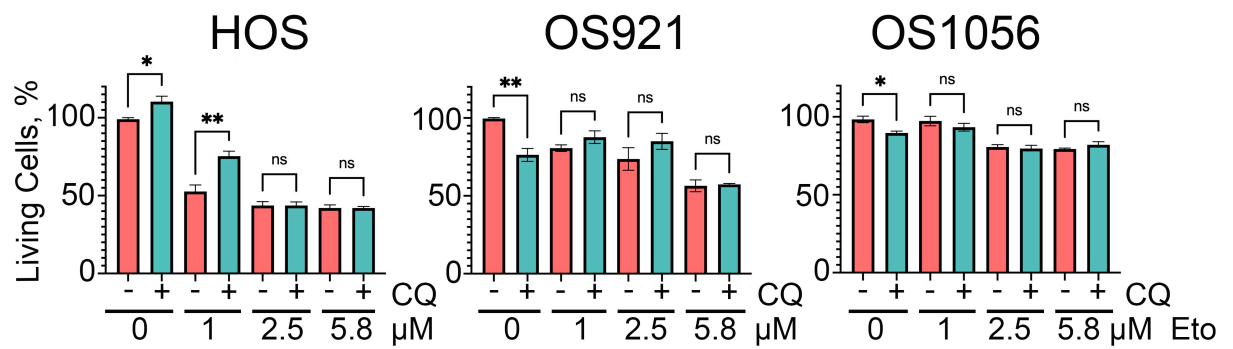

Figure S2. Simultaneous administration of etoposide and chloroquine does not enhance the cytotoxic effect of etoposide

HOS, OS921, and OS1056 cells were seeded in 96-well plates. The next day, following cell attachment, 25  $\mu\text{M}$  CQ and etoposide at the indicated concentrations were added simultaneously. After 24 hours, cell viability was assessed using the MTT assay. \* $p < 0.05$ ; \*\* $p < 0.0001$ .
